# Supplementary material
Source: HighWire-hosted journal article supplement (https://cmaj.ca/highwire/filestream/148474/field_highwire_adjunct_files/0/221207-res-1-at.pdf)
Supplement: 221207-res-1-at.pdf [file 221207-res-1-at.pdf]

SUPPLEMENTAL TABLES

**Supplemental Table 1. Selection criteria and resettlement support for relevant refugee and immigration streams in Canada. Reference: Evaluation of the resettlement programs (GAR, PSR, BVOR and RAP): Immigration, Refugees and Citizenship Canada 2016**

|                                                     | <b>Privately Sponsored Refugee (PSR)</b>                                                                       | <b>Government Assisted Refugee (GAR)</b>                                                         | <b>Blended Visa Office-Referred (BVOR)<sup>1</sup></b>     |
|-----------------------------------------------------|----------------------------------------------------------------------------------------------------------------|--------------------------------------------------------------------------------------------------|------------------------------------------------------------|
| <b>Selection Source</b>                             | UNHCR or similar agency, and matched to sponsors <sup>2</sup> , or identified by Sponsorship Agreement Holders | UNHCR or similar agency based upon medical need, survivors of violence and trauma, vulnerability | UNHCR or similar agency                                    |
| <b>Resettlement Services (1 year)</b>               | Private Sponsor                                                                                                | Federal Government                                                                               | Private Sponsor                                            |
| <b>Income Support (1 year)</b>                      | Private Sponsor                                                                                                | Federal Government                                                                               | 6 months Private Sponsor and 6 months Federal Government   |
| <b>Medical Care Coverage</b>                        | Provincial (Ontario) publicly funded health care insurance                                                     | Provincial (Ontario) publicly funded health care insurance                                       | Provincial (Ontario) publicly funded health care insurance |
| <b>Medication and Dental Care Coverage (1 year)</b> | Federal Government                                                                                             | Federal Government                                                                               | Federal Government                                         |

<sup>1</sup>Blended Visa Office Referred Refugees is a category introduced in 2013 by the Canadian government. Due to BVORs being privately sponsored, and only representing up to 2% of the recent refugee population, they were assigned to the PSR category.

<sup>2</sup>Private sponsors can be Sponsorship Agreement Holders (incorporated organization with a signed sponsorship agreement with Immigration Refugee Citizenship Canada (IRCC), groups of five Canadian citizens or permanent residents, or community sponsors who are organizations without formal agreements with the IRCC. Most PSRs are referred by friends or family.

**Supplemental Table 2. List of linked administrative health and demographic databases, corresponding covariates used in current study. Reference: ICES data dictionary. Available at [Datadictionary.ices.on.ca](http://Datadictionary.ices.on.ca).**

| <b>Database</b>                                                                    | <b>Data elements</b>                                                                                                                                                     | <b>Variable</b>                                                                                                                                                                                             | <b>Time Period</b>                              | <b>Date Range</b> |
|------------------------------------------------------------------------------------|--------------------------------------------------------------------------------------------------------------------------------------------------------------------------|-------------------------------------------------------------------------------------------------------------------------------------------------------------------------------------------------------------|-------------------------------------------------|-------------------|
| Canadian Institute for Health Information Discharge Abstract                       | Record of hospital admission data<br>Diagnostic codes associated with hospitalizations<br>Postal code                                                                    | Age, parity, time in Canada                                                                                                                                                                                 | At delivery                                     | 2002-2020         |
| Ontario Health Insurance Plan                                                      | Billing claims                                                                                                                                                           | Primary Care Affiliation, Major Aggregated Diagnosis Groups (ADG) and Resource Utilization Bands (RUB) (Johns Hopkins ACG @ System ADG case-mix adjustment system version 10)<br><br>Prenatal care provider | One year prior to conception<br><br>At delivery | 2002-2020         |
| Ontario Registered Persons                                                         | Patient sex, residential postal code, date of birth on all residents eligible for healthcare services                                                                    | Postal code for neighbourhood income quintile                                                                                                                                                               | At delivery                                     | 2002-2020         |
| ICES Physician Database                                                            | Physician specialty                                                                                                                                                      | Prenatal care provider                                                                                                                                                                                      | During pregnancy                                | 2002-2020         |
| Mother-Baby (MOMBABY)                                                              | Linked hospital admission records of mother and newborn                                                                                                                  | Outcome definition                                                                                                                                                                                          | During pregnancy                                | 2002-2020         |
| Statistics Canada's Postal Code Conversion File                                    | Neighbourhood income quintiles using Canadian Census data on the year closest to the immigration year                                                                    | Neighbourhood income quintile                                                                                                                                                                               | At delivery                                     | 2002-2020         |
| Immigration, Refugees, and Citizenship Canada's (IRCC) Permanent Resident Database | Immigration status, refugee resettlement sponsorship pathway, and characteristics upon immigration. Linkage of immigration data to the healthcare registry is done using | education (if age at arrival was >25 years), language ability (if age on arrival was >18 years), world region of origin, secondary migration.                                                               | Time of immigration                             | 1985-2017         |

|                                         |                                                                                                                                                                              |                                                            |  |           |
|-----------------------------------------|------------------------------------------------------------------------------------------------------------------------------------------------------------------------------|------------------------------------------------------------|--|-----------|
|                                         | demographic data (sex, postal code, dates of birth and first and surnames).                                                                                                  |                                                            |  |           |
| Community Health Centres (CHC) database | Electronic health records of all encounters from 2008 onwards for patients registered to CHCs (which are not captured in the Ontario Health Insurance Plan billing database) | Captured during pregnancy:<br>Prenatal care visits in CHCs |  | 2008-2019 |

**Supplemental Table 3. Inclusion and Exclusion criteria of non-refugee immigrant and long-term residents**

| <b>Inclusion/Exclusion</b>    | <b>Non-refugee immigrants</b>                                                                                                                                                                                                                               | <b>Long-Term Residents</b>                                                           |
|-------------------------------|-------------------------------------------------------------------------------------------------------------------------------------------------------------------------------------------------------------------------------------------------------------|--------------------------------------------------------------------------------------|
| <b>Dates of Conception</b>    | Conceived their first birth in Ontario between April 1, 2003 and May 31, 2019.<br>Conceived at least 365 days from date of arrival in Canada.                                                                                                               | Conceived their first birth in Ontario between April 1, 2003 and May 31, 2019.       |
| <b>Landing Dates</b>          | Landed in Canada between April 1 2002 and May 31, 2017.                                                                                                                                                                                                     | Not applicable.                                                                      |
| <b>Immigration Definition</b> | Immigrate to Canada under the immigration category of family class or economic class. Generally selected based on their high level of education, language fluency and work experience, or through sponsorship by a family member who is a Canadian citizen. | No record of immigration into Ontario since 1985, and includes those born in Ontario |

**Supplement Table 4. Adequate number of prenatal care visits based on minimum recommendations of the Society of Obstetricians and Gynaecologists of Canada. Reference: Schuurmans N, Blake J. Healthy beginnings: Guidelines for care during pregnancy and childbirth: Society of Obstetricians and Gynecologists of Canada 2017.**

| <b>Gestational Age at Birth</b> | <b>Minimum Number of Visits (if initiated at 11 weeks)*</b> |
|---------------------------------|-------------------------------------------------------------|
| 28 weeks                        | 3                                                           |
| 32 weeks                        | 4                                                           |
| 36 weeks                        | 6                                                           |
| 40 weeks                        | 9                                                           |

\*The number of visits recommended by the Society of Obstetricians and Gynaecologists of Canada (SOGC) is every 4 – 6 weeks at the beginning of pregnancy, 2-3 weeks after 30 weeks gestation, and every 1-2 weeks after 36 weeks and until delivery.

**Supplemental Table 5. Ontario Health Insurance Plan (OHIP) billing codes utilized to define prenatal visits and prenatal fetal anatomy ultrasonography. Reference: Schedule of benefits: Physician services under the health insurance act. Toronto, Ontario: Ministry of Health and Long-Term Care; 2015.**

| <b>Billing Code</b>   | <b>Specialty</b> | <b>Description</b>      |
|-----------------------|------------------|-------------------------|
| <b>Prenatal Visit</b> |                  |                         |
| A007                  | Family Physician | Intermediate assessment |

|                                          |                                 |                                                                    |
|------------------------------------------|---------------------------------|--------------------------------------------------------------------|
| A001                                     | Family Physician                | Minor assessment                                                   |
| A003                                     | Family Physician                | General Assessment                                                 |
| K013                                     | Family Physician                | Counselling/30min unit                                             |
| P002                                     | Obstetrician                    | High Risk Pregnancy                                                |
| P003                                     | Family Physician / Obstetrician | General assessment (Major prenatal visit)                          |
| P004                                     | Family Physician / Obstetrician | Minor assessment (Minor prenatal visit)                            |
| P005                                     | Family Physician / Obstetrician | Preventative Health Visit                                          |
| A205                                     | Obstetrician                    | Obstetrics Consult                                                 |
| A203                                     | Obstetrician                    | Specific Assessment                                                |
| A206                                     | Obstetrician                    | Repeat Consultation                                                |
| A204                                     | Obstetrician                    | Partial Assessment                                                 |
| <b>Prenatal fetal anatomy ultrasound</b> |                                 |                                                                    |
| J159                                     | Radiology                       | On or after 16 weeks' gestation (maximum one per normal pregnancy) |
| J459                                     | Radiology                       | On or after 16 weeks' gestation (maximum one per normal pregnancy) |
| J160                                     | Radiology                       | For high risk pregnancy or complications of pregnancy              |
| J460                                     | Radiology                       | For high risk pregnancy or complications of pregnancy              |

Supplement Table 6: Covariates used in Propensity Score Definitions and Justification

|                | Definition                                                                                                                                           | Justification                                                                                                                            |
|----------------|------------------------------------------------------------------------------------------------------------------------------------------------------|------------------------------------------------------------------------------------------------------------------------------------------|
| Age            | Age of female at delivery.                                                                                                                           | Age is a factor influencing both timing and amount of prenatal care received. <sup>1</sup>                                               |
| Parity         | Parity was recorded at the time of conception (using data from hospital delivery records).                                                           | People in their first pregnancy, or who have had greater than 3 pregnancies have a higher risk of inadequate prenatal care. <sup>2</sup> |
| Time in Canada | Measured as time since arrival in Ontario, Canada, at the time of conception.                                                                        | Knowledge of the healthcare system increases with time in Canada, and can change patterns of prenatal care utilization. <sup>3</sup>     |
| Language       | Ability to speak the official languages of Canada, was obtained for those who were > 18 years old upon arrival in Canada) through the IRCC database. | Language ability has been identified as a barrier to healthcare access as well as utilization. <sup>4</sup>                              |

|                                   |                                                                                                                                                                                                                                                                                                                                                                                                                                                                                                                       |                                                                                                                                                                                                              |
|-----------------------------------|-----------------------------------------------------------------------------------------------------------------------------------------------------------------------------------------------------------------------------------------------------------------------------------------------------------------------------------------------------------------------------------------------------------------------------------------------------------------------------------------------------------------------|--------------------------------------------------------------------------------------------------------------------------------------------------------------------------------------------------------------|
| Education                         | Educational attainment was measured upon arrival for those who were > 25 years old through the IRCC database.                                                                                                                                                                                                                                                                                                                                                                                                         | Lower level of education is associated with lower preventative care utilization. <sup>5</sup>                                                                                                                |
| Neighbourhood Income Quintile     | Approximated using the postal code from the delivery record of each patient, linked to the income quintile within a dissemination area which is adjusted for household and community size. Dissemination areas, which consist of small populations (400-700 people), are relatively homogenous but not a perfect proxy for individual level income.                                                                                                                                                                   | Socioeconomic status has been associated with prenatal care utilization. <sup>6</sup>                                                                                                                        |
| Secondary Migration               | Secondary migration was defined as having citizenship different from the country of last permanent residence) as a proxy variable for being in a refugee camp.                                                                                                                                                                                                                                                                                                                                                        | Refugees displaced to a refugee camps face higher risks of migration-related health care issues. <sup>7</sup>                                                                                                |
| Primary Care Affiliation          | Primary care affiliation was assigned based upon visits during the one year prior to conception. Those individuals that were seen at a CHC were categorized as ‘CHC’; Those rostered in a primary care model were identified as affiliated with a ‘comprehensive model’; Individuals not rostered in a primary care model (ie patients seeing solo-practitioner physicians or using walk-in clinics) were categorized as ‘fee for service or no model’; Those with no primary care use were defined as such (‘none’). | Primary care affiliation is associated with utilization of healthcare services. <sup>8</sup>                                                                                                                 |
| Major Aggregated Diagnosis Groups | The Johns Hopkins ACG ® System Aggregated Diagnosis Groups (ADGs) case-mix adjustment system (version 10) was used to assign individuals to a single, mutually exclusive ACG value, using this classification as a relative measure of the individual’s expected or actual consumption of healthcare services. The ACG system allocates                                                                                                                                                                               | Comorbidity burden can increase the need for additional or earlier prenatal care. <sup>1</sup> GARs are known to be selected based on health needs and so may have a higher comorbidity burden. <sup>9</sup> |

|                                   |                                                                                                                                                                                                                                                                                                                                                                                                                                                                                                                                        |                                                                                                                                             |
|-----------------------------------|----------------------------------------------------------------------------------------------------------------------------------------------------------------------------------------------------------------------------------------------------------------------------------------------------------------------------------------------------------------------------------------------------------------------------------------------------------------------------------------------------------------------------------------|---------------------------------------------------------------------------------------------------------------------------------------------|
|                                   | <p>International Classification of Disease (ICD) codes to clusters known as Aggregated Diagnosis Groups (ADG). An individual may have diagnoses that belong between zero to 32 ADGs; these 32 ADGs can be collapsed into 12 collapsed ADGs. Any major morbidity was characterized as time-limited major; chronic medical, unstable; psychosocial, unstable; progressive or likely to recur; or a malignancy.</p>                                                                                                                       |                                                                                                                                             |
| <p>Resource Utilization bands</p> | <p>Resource Utilization Bands (RUBS) are a ranking system of overall morbidity level based upon expected use of healthcare. They are also part of the Johns Hopkins ACG case-mix system. They are a simplified ranking system of overall morbidity level whereby individuals who are expected to use the same level of resources are grouped together regardless of illness or epidemiological patterns. There are six classes: 0 - No or only invalid diagnosis; 1 - Healthy users; 2- Low 3; 3- moderate; 4- High; 5- Very High.</p> | <p>Higher users of health care are likely to require more prenatal care (higher number of prenatal visits or ultrasounds).<sup>10</sup></p> |

**Supplemental Table 7. Characteristics of resettled refugee women, non-refugee immigrant women, and long-term residents who gave birth in Ontario, Canada from 2002 to 2020.** All data are shown as a number (%) unless otherwise indicated.

| Characteristic                                  | Resettled Refugees (ResR)<br>(N = 5149) | Non-refugee Immigrants (Imm)<br>(N = 105,099) | Long-Term Residents (LTR)<br>(N = 557,950) | Standardized difference <sup>1</sup> |              |             |
|-------------------------------------------------|-----------------------------------------|-----------------------------------------------|--------------------------------------------|--------------------------------------|--------------|-------------|
|                                                 |                                         |                                               |                                            | Imm vs. ResR                         | LTR vs. ResR | Imm vs. LTR |
| <b>Age at conception, y</b>                     |                                         |                                               |                                            |                                      |              |             |
| Mean (SD) age, y                                | 28.7 (6.0)                              | 30.4 (4.9)                                    | 28.0 (5.6)                                 | 0.30                                 | 0.12         | 0.45        |
| <18                                             | 87 (1.7)                                | 261 (0.25)                                    | 19335 (3.5)                                |                                      |              |             |
| 18-22                                           | 698 (13.5)                              | 5255 (5.0)                                    | 81822 (14.7)                               |                                      |              |             |
| 23-27                                           | 1515 (29.4)                             | 24544 (23.4)                                  | 140558 (25.2)                              |                                      |              |             |
| 28-32                                           | 1435 (27.8)                             | 39937 (38.0)                                  | 198572 (35.6)                              |                                      |              |             |
| 33-37                                           | 999 (19.4)                              | 26484 (25.2)                                  | 93666 (16.8)                               |                                      |              |             |
| 38-49                                           | 426 (8.3)                               | 8618 (8.2)                                    | 23997 (4.3)                                |                                      |              |             |
| <b>Parity</b>                                   |                                         |                                               |                                            |                                      |              |             |
| Mean (SD)                                       | 1.1 (1.0)                               | 0.8 (1.2)                                     | 0.5 (0.4)                                  | 0.38                                 | 0.89         | 0.58        |
| 0                                               | 2989 (57.9)                             | 74830 (71.2)                                  | 517579 (92.8)                              |                                      |              |             |
| 1                                               | 679 (13.2)                              | 22808 (21.9)                                  | 28908 (5.2)                                |                                      |              |             |
| 2                                               | 659 (12.8)                              | 5570 (5.3)                                    | 7917 (1.4)                                 |                                      |              |             |
| 3                                               | 396 (7.7)                               | 1471 (1.4)                                    | 2364 (0.42)                                |                                      |              |             |
| 4+                                              | 434 (8.4)                               | 420 (0.4)                                     | 1182 (0.21)                                |                                      |              |             |
| <b>Duration of residence in Canada, y</b>       |                                         |                                               |                                            |                                      |              |             |
| Mean (SD)                                       | 4.1 (3.2)                               | 4.1 (3.0)                                     | ..                                         | 0.2                                  | ..           | ..          |
| 1 to < 3                                        | 2148 (41.6)                             | 49396 (47.0)                                  | ..                                         | 0.11                                 | ..           | ..          |
| 3 to < 5                                        | 1107 (21.5)                             | 26274 (25.0)                                  | ..                                         | 0.08                                 | ..           | ..          |
| 5 to < 10                                       | 1367 (26.5)                             | 2913 (21.8)                                   | ..                                         | 0.11                                 | ..           | ..          |
| 10+                                             | 538 (10.4)                              | 6516 (6.2)                                    | ..                                         | 0.15                                 | ..           | ..          |
| <b>Year of index delivery</b>                   |                                         |                                               |                                            |                                      |              |             |
| 2003-2008                                       | 352 (6.8)                               | 14714 (14.0)                                  | 146740 (26.3)                              | 0.24                                 | 0.54         | 0.30        |
| 2009-2014                                       | 1485 (28.8)                             | 42565 (40.5)                                  | 198082 (35.5)                              | 0.24                                 | 0.14         | 0.10        |
| 2015-2020                                       | 3312 (34.3)                             | 47820 (45.5)                                  | 213128 (38.1)                              | 0.39                                 | 0.54         | 0.15        |
| <b>Education level at landing</b>               |                                         |                                               |                                            |                                      |              |             |
| None                                            | 296 (5.8)                               | 3783 (3.6)                                    | ..                                         | 0.10                                 | ..           | ..          |
| No postsecondary education                      | 1362 (26.4)                             | 7882 (7.5)                                    | ..                                         | 0.52                                 | ..           | ..          |
| Postsecondary education below bachelor's degree | 232 (4.5)                               | 9354 (8.9)                                    | ..                                         | 0.17                                 | ..           | ..          |

Appendix 1, as supplied by the authors. Appendix to: Evans A, Ray JG, Austin PC, et al. Receipt of adequate prenatal care for privately sponsored versus government-assisted refugees in Ontario, Canada: a population-based cohort study. *CMAJ* 2023. doi: 10.1503/cmaj.221207. Copyright © 2023 The Author(s) or their employer(s). To receive this resource in an accessible format, please contact us at [cmajgroup@cmaj.ca](mailto:cmajgroup@cmaj.ca)



| Characteristic                                                       | Resettled Refugees (ResR)<br>(N = 5149) | Non-refugee Immigrants (Imm)<br>(N = 105,099) | Long-Term Residents (LTR)<br>(N = 557,950) | Standardized difference <sup>1</sup> |              |             |
|----------------------------------------------------------------------|-----------------------------------------|-----------------------------------------------|--------------------------------------------|--------------------------------------|--------------|-------------|
|                                                                      |                                         |                                               |                                            | Imm vs. ResR                         | LTR vs. ResR | Imm vs. LTR |
| <i>Bachelors or higher</i>                                           | 290 (5.6)                               | 40672 (38.4)                                  | ..                                         | 0.86                                 | ..           | ..          |
| <i>College diploma or trade certificate</i>                          | 73 (1.4)                                | 2627 (2.5)                                    | ..                                         | 0.08                                 | ..           | ..          |
| <i>Not applicable (age was &lt; 25 y at landing, or was missing)</i> | 2907 (56.4)                             | 41409(39.4)                                   | ..                                         | 0.35                                 | ..           | ..          |
| <b>Official language ability<sup>1</sup></b>                         |                                         |                                               |                                            |                                      |              |             |
| <i>English or French</i>                                             | 1780 (34.4)                             | 77353 (73.6)                                  | ..                                         | 0.85                                 | ..           | ..          |
| <i>Neither</i>                                                       | 3380 (65.5)                             | 27746 (26.4)                                  | ..                                         | 0.85                                 | ..           | ..          |
| <b>Secondary migration<sup>2</sup></b>                               | 3172 (61.5)                             | 95534 (90.9)                                  | ..                                         | 0.73                                 | ..           | ..          |
| <b>Neighbourhood income quintile</b>                                 |                                         |                                               |                                            |                                      |              |             |
| <i>1 (lowest)</i>                                                    | 3125 (60.6)                             | 32896 (31.3)                                  | 113018 (20.3)                              | 0.03                                 | 0.91         | 0.26        |
| <i>2</i>                                                             | 894 (17.3)                              | 24908 (23.7)                                  | 114276 (20.5)                              | 0.61                                 | 0.08         | 0.08        |
| <i>3</i>                                                             | 561 (10.9)                              | 20706 (19.7)                                  | 116906 (21.0)                              | 0.16                                 | 0.28         | 0.03        |
| <i>4</i>                                                             | 400 (7.8)                               | 16500 (15.7)                                  | 118579 (21.3)                              | 0.24                                 | 0.39         | 0.14        |
| <i>5 (highest)</i>                                                   | 178 (3.4)                               | 10089 (9.6)                                   | 95185 (17.1)                               | 0.25                                 | 0.46         | 0.22        |
| <b>Primary care affiliation<sup>3</sup></b>                          |                                         |                                               |                                            |                                      |              |             |
| <i>Community health center</i>                                       | 249 (4.8)                               | 841 (0.80)                                    | 4071 (0.8)                                 | 0.22                                 | 0.24         | 0.02        |
| <i>Comprehensive model</i>                                           | 3283 (63.6)                             | 69156 (65.8)                                  | 371409 (66.6)                              | 0.04                                 | 0.06         | 0.02        |
| <i>Fee for Service or no model</i>                                   | 1415 (27.4)                             | 28271 (26.9)                                  | 147261 (26.4)                              | 0.01                                 | 0.02         | 0.02        |
| <i>None</i>                                                          | 213 (4.1)                               | 6831 (6.5)                                    | 35209 (6.3)                                | 0.11                                 | 0.10         | 0.03        |
| <b>Resource utilization band<sup>4</sup></b>                         |                                         |                                               |                                            |                                      |              |             |
| <i>Non-user</i>                                                      | 453 (8.8)                               | 11140 (10.6)                                  | 60816 (10.9)                               | 0.06                                 | 0.07         | 0.01        |
| <i>Healthy user</i>                                                  | 293 (5.7)                               | 7882 (7.5)                                    | 58026 (10.4)                               | 0.07                                 | 0.18         | 0.1         |
| <i>Low morbidity</i>                                                 | 1131 (21.9)                             | 28061 (26.7)                                  | 152878 (27.4)                              | 0.11                                 | 0.13         | 0.02        |
| <i>Moderate morbidity</i>                                            | 2452 (47.5)                             | 45199 (43.0)                                  | 222396 (39.9)                              | 0.09                                 | 0.15         | 0.06        |
| <i>High Morbidity</i>                                                | 809 (15.7)                              | 12716 (12.1)                                  | 62490 (11.2)                               | 0.10                                 | 0.13         | 0.03        |
| <i>Very High morbidity</i>                                           | 22 (0.43)                               | 115 (0.11)                                    | 892 (0.16)                                 | 0.06                                 | 0.05         | 0.01        |
| <b>Any major morbidity<sup>5</sup></b>                               | 1266 (24.5)                             | 19863(18.9)                                   | 109916 (19.7)                              | 0.14                                 | 0.12         | 0.02        |
| <b>World region of origin<sup>6</sup></b>                            |                                         |                                               |                                            |                                      |              |             |

Appendix 1, as supplied by the authors. Appendix to: Evans A, Ray JG, Austin PC, et al. Receipt of adequate prenatal care for privately sponsored versus government-assisted refugees in Ontario, Canada: a population-based cohort study. *CMAJ* 2023. doi: 10.1503/cmaj.221207. Copyright © 2023 The Author(s) or their employer(s). To receive this resource in an accessible format, please contact us at [cmajgroup@cmaj.ca](mailto:cmajgroup@cmaj.ca)

| Characteristic                                  | Resettled Refugees (ResR)<br>(N = 5149) | Non-refugee Immigrants (Imm)<br>(N = 105,099) | Long-Term Residents (LTR)<br>(N = 557,950) | Standardized difference <sup>1</sup> |              |             |
|-------------------------------------------------|-----------------------------------------|-----------------------------------------------|--------------------------------------------|--------------------------------------|--------------|-------------|
|                                                 |                                         |                                               |                                            | Imm vs. ResR                         | LTR vs. ResR | Imm vs. LTR |
| <i>Africa &amp; Middle East</i>                 | 3327 (64.5)                             | 12219 (11.6)                                  | ..                                         | 1.3                                  | ..           | ..          |
| <i>Americas</i>                                 | 129 (2.5)                               | 11771 (11.2)                                  | ..                                         | 0.49                                 | ..           | ..          |
| <i>Asia &amp; Pacific</i>                       | 1534 (29.7)                             | 68945 (65.6)                                  | ..                                         | 0.77                                 | ..           | ..          |
| <i>Europe</i>                                   | 100 (1.9)                               | 12008 (11.4)                                  | ..                                         | 0.39                                 | ..           | ..          |
| <i>Stateless</i>                                | 70 (1.3)                                | 210 (0.2)                                     | ..                                         | 0.13                                 | ..           | ..          |
| <b>Prenatal care provider<sup>7</sup></b>       |                                         |                                               |                                            |                                      |              |             |
| <i>Family physician</i>                         | 730 (14.2)                              | 9669 (9.2)                                    | 94629 (17.0)                               | 0.14                                 | 0.08         | 0.22        |
| <i>Community health centre</i>                  | 25 (0.48)                               | 53 (0.05)                                     | 268 (0.05)                                 | 0.09                                 | 0.08         | 0.0         |
| <i>Obstetrician</i>                             | 1727 (33.5)                             | 48367 (46.0)                                  | 251314 (45.0)                              | 0.26                                 | 0.24         | 0.02        |
| <i>Obstetrician and community health centre</i> | 115 (2.2)                               | 494 (0.47)                                    | 2539 (0.45)                                | 0.15                                 | 0.16         | 0.0         |
| <i>Family physician/obstetrician mix</i>        | 2558 (49.7)                             | 46558 (44.3)                                  | 209256 (37.5)                              | 0.11                                 | 0.25         | 0.0         |

<sup>1</sup>Standardized differences (SD) with a value > 0.10 considered potentially important.

<sup>2</sup>Self reported for Canada's official languages of French and English.

<sup>3</sup>Secondary migration indicates country of citizenship was different from their country of last permanent residence

<sup>4</sup>'Community Health Clinics' are unique primary health care delivery models which prioritize immigrant and refugee populations, 'Comprehensive' refers to enrollment in any primary care model, 'Fee-for-service' refers to physicians who are not part of primary care models such as solo practicing or walk-in clinic physicians, and 'None' refers to having no primary care visits in the previous year.

<sup>5</sup>Resource utilization bands are a ranking system of overall morbidity level based upon expected use of the healthcare system.

<sup>6</sup>Any major morbidity is based on the Johns Hopkins ACG® System Aggregated Diagnosis Groups case-mix adjustment system. Any major morbidity was characterized as time-limited major; chronic medical, unstable; psychosocial, unstable; progressive or likely to recur; or a malignancy.

<sup>7</sup>Regions of origin were assigned based on country of citizenship

<sup>8</sup>Prenatal care provider is the physician who provided >70% of visits for prenatal care provided by this specialty, or if less a mix is indicated.

Supplement Table 8. Relative risks of adequate prenatal care by the Adequacy of Perinatal Care Utilization (APCU) Index among Privately Sponsored Refugees vs Government Assisted Refugees.

| Adequate prenatal care by APCU Index <sup>1</sup> | Relative Risk (95% Confidence Interval) |
|---------------------------------------------------|-----------------------------------------|
| Privately Sponsored Refugee                       | Referent                                |
| Government Sponsored Refugee                      | Unweighted 0.95 (0.92-0.96)             |
|                                                   | Weighted 0.95 (0.89-1.0) <sup>2</sup>   |

<sup>1</sup> Adequacy of Prenatal Care Use Index utilizes the month prenatal care began, and proportion of visits received, as recommended by the Society of Obstetrics and Gynaecology of Canada. Prenatal care is deemed to be not adequate if initiated after 16 weeks' gestation.

<sup>2</sup> Weighted results are based on the inverse probability treatment weighted analysis using a propensity score that included maternal age, parity, year of delivery, education, language ability, neighbourhood income quintile, primary care affiliation, resource utilization band and the presence of a major maternal comorbidity.

Supplemental Table 9. Adequate prenatal care by the Adequacy of Perinatal Care Utilization (APCU) Index results among Government Assisted Refugees, Privately Sponsored Refugees, and the secondary cohorts of non-refugee immigrant and long-term residents in Ontario.

| Prenatal care outcome                             | Number with outcome/<br>number eligible (%) | Relative risk (95% CI) |
|---------------------------------------------------|---------------------------------------------|------------------------|
| Adequate prenatal care by APCU Index <sup>1</sup> |                                             |                        |
| Long-term residents of Ontario                    | 482369/557950 (86.5)                        | 1.00 (Referent)        |
| Non-refugee immigrants                            | 92487/105099 (88.4)                         | 1.02 (1.02-1.03)       |
| Privately Sponsored Refugees                      | 2081/2374 (87.7)                            | 1.01 (1.00-1.03)       |
| Government Assisted Refugees                      | 2267/2775 (81.7)                            | 0.94 (0.93-0.96)       |

<sup>1</sup> Adequacy of Prenatal Care Use Index utilizes the month prenatal care began, and proportion of visits received, as recommended by the Society of Obstetrics and Gynaecology of Canada. Prenatal care is deemed to be not adequate if initiated after 16 weeks' gestation.

#### Appendices References:

1. Osterman Mjk Fau - Martin JA, Martin JA. Timing and Adequacy of Prenatal Care in the United States, 2016. 2018; (1551-8922 (Print)).
2. Debessai Y, Costanian C, Roy M, El-Sayed M, Tanim H. Inadequate prenatal care use among Canadian mothers: findings from the Maternity Experiences Survey. *J Perinatol* 2016; **36**(6):420-6.
3. Heaman M, Bayrampour H, Kingston D, et al. Migrant women's utilization of prenatal care: a systematic review. *Maternal and child health journal* 2013; **17**(5): 816-36.

4. Muggah E, Dahrouge S, Hogg W. Access to primary health care for immigrants: results of a patient survey conducted in 137 primary care practices in Ontario, Canada. *BMC family practice* 2012; **13**: 128.
5. Baer RJ, Altman MR, Oltman SP, et al. Maternal factors influencing late entry into prenatal care: a stratified analysis by race or ethnicity and insurance status. 2018; (1476-4954 (Electronic)).
6. Kandasamy T, Cherniak R, Shah R, Yudin MH, Spitzer R. Obstetric risks and outcomes of refugee women at a single centre in Toronto. *Journal of obstetrics and gynaecology Canada : JOGC = Journal d'obstetrique et gynecologie du Canada : JOGC* 2014; **36**(4): 296-302.
7. Heaman MI, Moffatt M Fau - Elliott L, Elliott L Fau - Sword W, et al. Barriers, motivators and facilitators related to prenatal care utilization among inner-city women in Winnipeg, Canada: a case-control study. 2014 ; (1471-2393 (Electronic)).
8. Dahrouge S, Hogg W, Younger J, Muggah E, Russell G, Glazier RH. Primary Care Physician Panel Size and Quality of Care: A Population-Based Study in Ontario, Canada. *Annals of family medicine* 2016; **14**(1): 26-33.
9. Saunders NR, Gandhi S, Wanigaratne S, et al. Health Care Use and System Costs Among Pediatric Refugees in Canada. LID - e2022057441 [pii] LID - 10.1542/peds.2022-057441 [doi]. 2023; (1098-4275 (Electronic)).
10. Konnyu KJ, Danilack Va Fau - Adam GP, Adam Gp Fau - Friedman Peahl A, Friedman Peahl A Fau - Cao W, Cao W Fau - Balk EM, Balk EM. Changes to Prenatal Care Visit Frequency and Telehealth: A Systematic Review of Qualitative Evidence. 2023; (1873-233X (Electronic)).
